# Supplementary material for: A Stalagmite Test of North Atlantic SST and Iberian Hydroclimate Linkages over the Last Two Glacial Cycles
Source: Copernicus journal article supplement (doi:10.5194/cp-2017-146), 2017-11-24
Supplement: Supplementary file 1 [file cp-2017-146-supplement.pdf]

## Supplemental Material

### A Stalagmite Test of North Atlantic SST and Iberian Hydroclimate Linkages over the Last Two Glacial Cycles

*R.F. Denniston et al.*

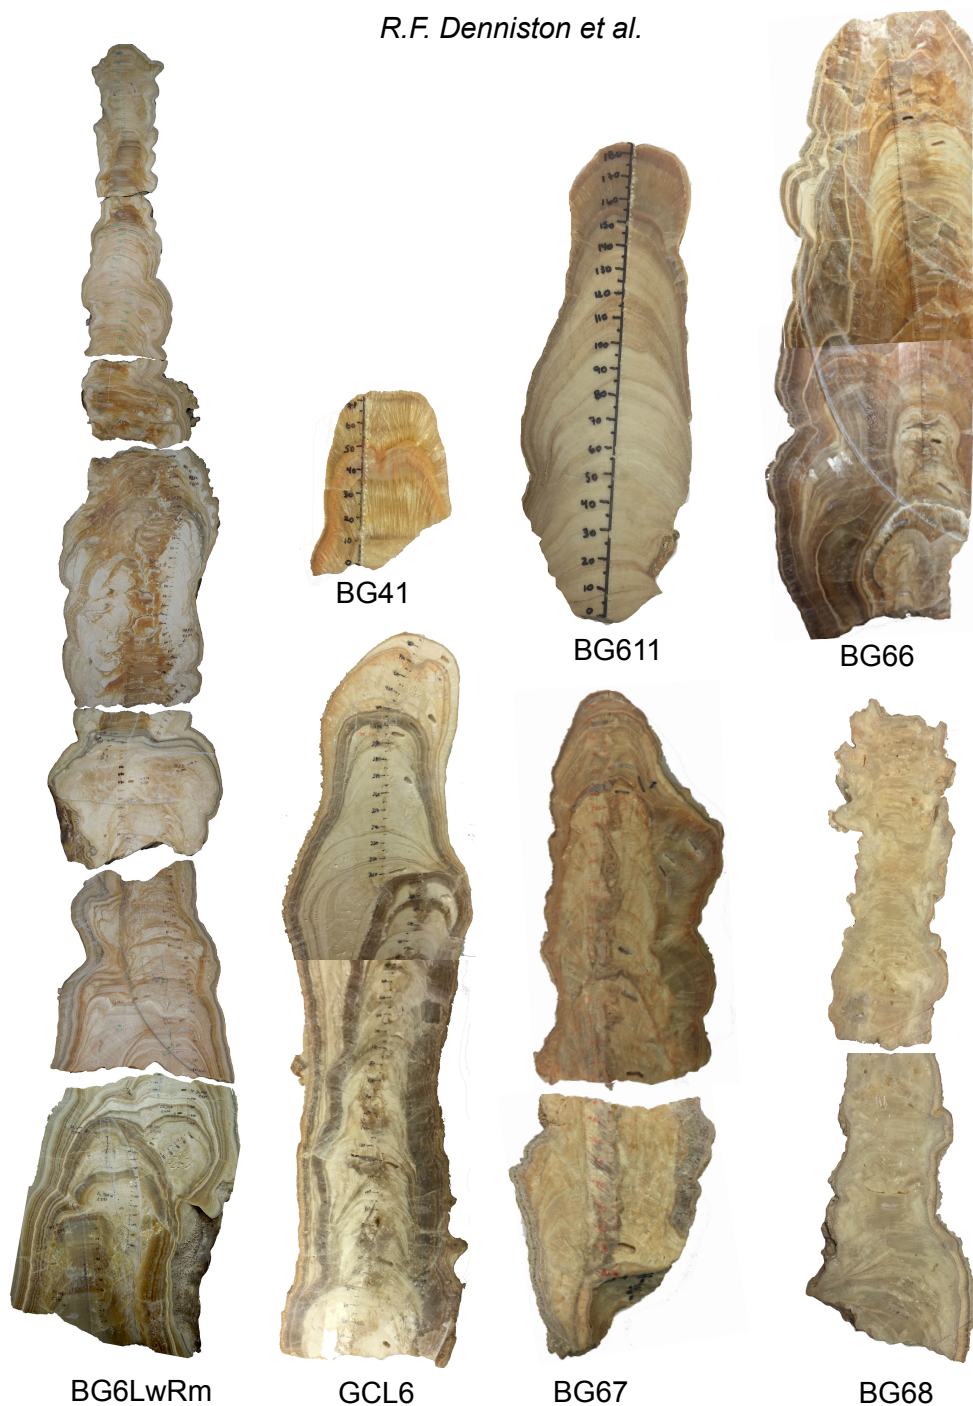

**Figure S1. BG and GCL stalagmites.** Scales are adjusted individually for ease of presentation. Demarcation lines along central axes shown in cm's.

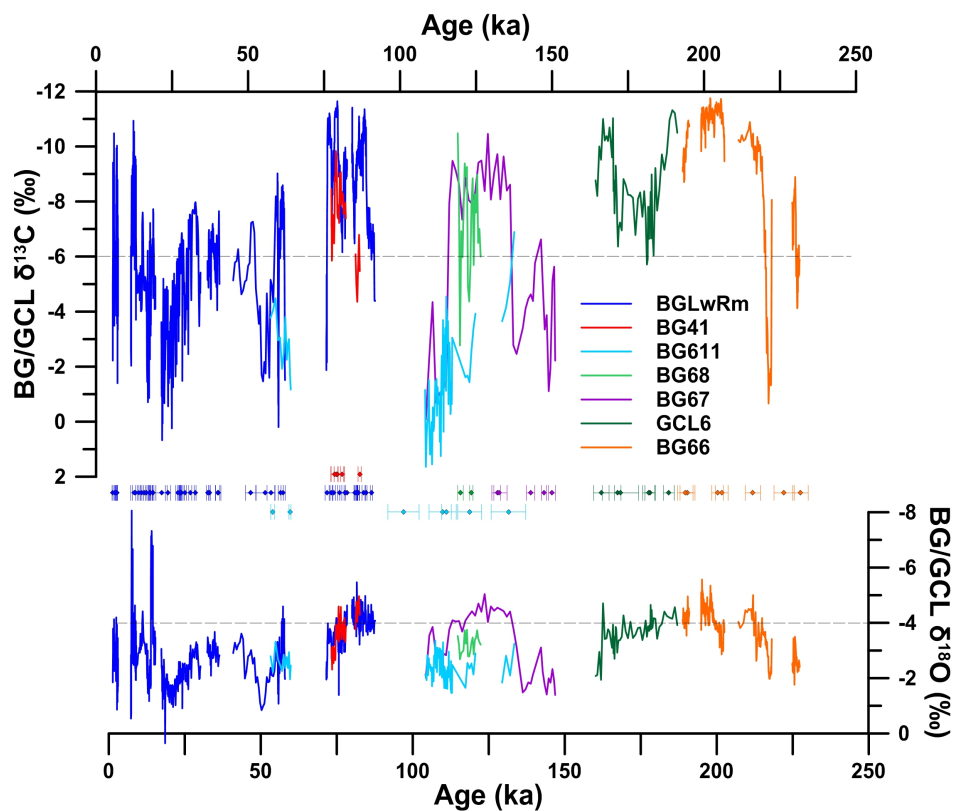

**Figure S2. Carbon and oxygen isotopic time series for BG and GCL stalagmites.**
